# Supplementary material
Source: publisher figshare collection journal article supplement (https://acs.figshare.com/ndownloader/files/4557748)
Supplement: Supplementary file 1 [file 4557748]

Supporting Information  
for the research article:

**Energy and Air Emissions embodied in China-U.S. Trade: Eastbound Assessment using Adjusted  
Bilateral Trade Data**

Ming Xu<sup>1\*</sup>, Braden Allenby<sup>1</sup>, Weiqiang Chen<sup>2</sup>

<sup>1</sup>Center for Earth Systems Engineering and Management, Department of Civil, Environmental and  
Sustainable Engineering, Arizona State University, Tempe, AZ, U.S.A.

<sup>2</sup>Department of Environmental Science and Engineering, Tsinghua University, Beijing, China

**Contents**

**Page S2.** Table S1 Eastbound China-U.S. trade data from official statistics and adjustments (in billion U.S. dollars).

**Page S3.** Table S2 Classification of economic sectors in 45-sector format (bold) and 122-sector format (regular).

**Page S6.** Figure S1 Total Chinese exports to the U.S. by commodity group in 2002 dollars.

**Page S7.** Table S3 Embodied energy in the eastbound China-U.S. trade by commodity group and energy type in PJ.

**Page S9.** Table S4 Embodied air emissions in the eastbound China-U.S. trade by commodity group in Mt.

**Page S10.** Figure S2 Embodied energy in Chinese textile exports to the U.S.

**Page S10.** Figure S3 Embodied air emissions in Chinese exports to the U.S.

**Page S11.** Table S5 Total Chinese exports to the world and embodied energy and emissions.

**Page S11.** Table S6 Eastbound trade to the U.S. and embodied energy and emissions.

**Page S11.** Table S7 Percentage of Chinese exports and embodied energy and emissions to the U.S. in the total exports to the world.

**Page S12.** Literature Cited

**Number of pages:** 12

**Table S1 Eastbound China-U.S. trade data from official statistics and adjustments (in billion U.S. dollars).**

| Year | Chinese data<br>(1) | U.S. data<br>(1) | Discrepancy (% of Chinese<br>data) | Adjustment       |             |       |
|------|---------------------|------------------|------------------------------------|------------------|-------------|-------|
|      |                     |                  |                                    | This<br>research | (2)         | (3)   |
| 2002 | 70.1                | 133.5            | 90.4%                              | 113.0            | 94.5~109.5  | 95.3  |
| 2003 | 92.6                | 163.3            | 76.4%                              | 146.3            | 116.5~135.6 | 117.8 |
| 2004 | 125.2               | 210.5            | 68.1%                              | 172.3            | 149.9~175.4 | N/A   |
| 2005 | 163.2               | 259.8            | 59.2%                              | 207.0            | 189.7~219.5 | N/A   |
| 2006 | 203.8               | 305.8            | 50.1%                              | 282.9            | N/A         | N/A   |
| 2007 | 233.1               | 340.1            | 45.9%                              | 289.9            | N/A         | N/A   |

**Table S2 Classification of economic sectors in 45-sector format (bold) and 122-sector format (regular).**

|                                                                           |                                                 |
|---------------------------------------------------------------------------|-------------------------------------------------|
| <b>Farming, Forestry, Animal Husbandry, Fishery and Water Conservancy</b> |                                                 |
| Agriculture                                                               | Forestry                                        |
| Livestock Husbandry                                                       | Fishery                                         |
| Agriculture Services                                                      |                                                 |
| <b>Logging and Transport of Wood and Bamboo</b>                           |                                                 |
| Logging and Transport of Wood and Bamboo                                  |                                                 |
| <b>Coal Mining and Dressing</b>                                           |                                                 |
| Coal Mining and Dressing                                                  |                                                 |
| <b>Petroleum and Natural Gas Extraction</b>                               |                                                 |
| Petroleum and Natural Gas Extraction                                      |                                                 |
| <b>Ferrous Metals Mining and Dressing</b>                                 |                                                 |
| Ferrous Metals Mining and Dressing                                        |                                                 |
| <b>Nonferrous Metals Mining and Dressing</b>                              |                                                 |
| Nonferrous Metals Mining and Dressing                                     |                                                 |
| <b>Other Minerals Mining and Dressing</b>                                 |                                                 |
| Other Minerals Mining and Dressing                                        |                                                 |
| <b>Nonmetal Minerals Mining and Dressing</b>                              |                                                 |
| Nonmetal Minerals Mining and Dressing                                     |                                                 |
| <b>Food Processing</b>                                                    |                                                 |
| Corn Milling                                                              | Feed Processing                                 |
| Vegetable Oil Processing                                                  | Sugar Manufacturing                             |
| Abattoir and Meat Processing                                              | Fishery Processing                              |
| <b>Food Production</b>                                                    |                                                 |
| Food Production                                                           |                                                 |
| <b>Beverage Production</b>                                                |                                                 |
| Alcohol and Potable Spirit Manufacturing                                  | Beverage Manufacturing                          |
| <b>Tobacco Processing</b>                                                 |                                                 |
| Tobacco Processing                                                        |                                                 |
| <b>Textile Industry</b>                                                   |                                                 |
| Cotton and Chemical Fiber Textile and Printing, Dyeing and Refining       | Wool Textile and Dyeing, Finishing and Refining |
| Linen and Silk Textile and Refining                                       | Textile Products                                |
| Knitting and Weaving Products                                             |                                                 |
| <b>Garments, Footwear and Headgear</b>                                    |                                                 |
| Garments, Footwear and Headgear                                           |                                                 |
| <b>Leather, Furs, Down and Related Products</b>                           |                                                 |
| Leather, Furs, Down and Related Products                                  |                                                 |
| <b>Timber Processing, Bamboo, Cane, Palm Fiber &amp; Straw Products</b>   |                                                 |
| Timber Processing, Bamboo, Cane, Palm Fiber & Straw Products              |                                                 |
| <b>Furniture Manufacturing</b>                                            |                                                 |
| Furniture Manufacturing                                                   |                                                 |
| <b>Papermaking and Paper Products</b>                                     |                                                 |
| Papermaking and Paper Products                                            |                                                 |
| <b>Printing and Record Medium Reproduction</b>                            |                                                 |
| Printing and Record Medium Reproduction                                   |                                                 |
| <b>Cultural, Educational and Sports Articles</b>                          |                                                 |
| Cultural and Educational Goods                                            | Toy, Sports, and Entertainment Goods            |
| <b>Petroleum Processing and Coking</b>                                    |                                                 |
| Petroleum and Nuclear Fuel Processing                                     | Coking                                          |
| <b>Raw Chemical Materials and Chemical Products</b>                       |                                                 |
| Raw Chemical Materials                                                    | Fertilizer Manufacturing                        |

|                                                                     |                                                     |
|---------------------------------------------------------------------|-----------------------------------------------------|
| Pesticide Manufacturing                                             | Paints, Pigments, Printing Ink and Similar Products |
| Synthetic Materials                                                 | Special Chemical Products                           |
| General Chemical Products                                           |                                                     |
| <b>Medical and Pharmaceutical Products</b>                          |                                                     |
| Medical and Pharmaceutical Products                                 |                                                     |
| <b>Chemical Fiber</b>                                               |                                                     |
| Chemical Fiber                                                      |                                                     |
| <b>Rubber Products</b>                                              |                                                     |
| Rubber Products                                                     |                                                     |
| <b>Plastic Products</b>                                             |                                                     |
| Plastic Products                                                    |                                                     |
| <b>Nonmetal Mineral Products</b>                                    |                                                     |
| Cement, Lime, and Plaster                                           | Glass and Glass wares                               |
| Ceramic Products                                                    | Refractory Material Products                        |
| Other Non-metal Products                                            |                                                     |
| <b>Smelting and Pressing of Ferrous Metals</b>                      |                                                     |
| Iron Ore Smelting                                                   | Steel Smelting                                      |
| Steel Pressing                                                      | Ferroalloy Smelting                                 |
| <b>Smelting and Pressing of Nonferrous Metals</b>                   |                                                     |
| Nonferrous Metal Smelting                                           | Non-ferrous Pressing                                |
| <b>Metal Products</b>                                               |                                                     |
| Metal Products                                                      |                                                     |
| <b>Ordinary Machinery</b>                                           |                                                     |
| Boilers, Engines, and Turbines                                      | Metalworking Machinery                              |
| Other Ordinary Machinery                                            |                                                     |
| <b>Equipment for Special Purposes</b>                               |                                                     |
| Agricultural Machinery                                              | Other Equipment for Special Purposes                |
| <b>Transportation Equipment</b>                                     |                                                     |
| Railway Transportation Equipment                                    | Automobile Manufacturing                            |
| Automobile Components and Parts Manufacturing                       | Ship and Floating Device Manufacturing              |
| Other Transportation Equipment                                      |                                                     |
| <b>Electric Equipment and Machinery</b>                             |                                                     |
| Motor Manufacturing                                                 | Household Appliance Manufacturing                   |
| Other Electric Equipment and Machinery                              |                                                     |
| <b>Electronic and Telecommunications Equipment</b>                  |                                                     |
| Telecommunication Equipment                                         | Computer Manufacturing                              |
| Other Computer Equipment                                            | Electronic Devices                                  |
| Household Audio-Visual Equipment                                    | Other Electronic and Telecommunications Equipment   |
| <b>Instruments, Meters, Cultural and Office Machinery</b>           |                                                     |
| Measuring Instruments and Meters Manufacturing                      | Cultural and Office Machinery                       |
| <b>Other Manufacturing Industry</b>                                 |                                                     |
| Arts Manufacturing                                                  | Other Manufacturing                                 |
| <b>Waste Resources and Materials Recycling and Processing</b>       |                                                     |
| Waste Resources and Materials Recycling and Processing              |                                                     |
| <b>Production and Supply of Electric Power, Steam and Hot Water</b> |                                                     |
| Production and Supply of Electric Power, Steam and Hot Water        |                                                     |
| <b>Production and Supply of Gas</b>                                 |                                                     |
| Production and Supply of Gas                                        |                                                     |
| <b>Production and Supply of Tap Water</b>                           |                                                     |
| Production and Supply of Water                                      |                                                     |
| <b>Construction</b>                                                 |                                                     |
| Construction                                                        |                                                     |
| <b>Transportation, Storage, Post and Telecommunication Services</b> |                                                     |

|                                                          |                                                              |
|----------------------------------------------------------|--------------------------------------------------------------|
| Railway Passenger Transportation                         | Railway Freight Transportation                               |
| Road Transportation                                      | Urban Public Transportation                                  |
| Waterborne Transportation                                | Air Passenger Transportation                                 |
| Air Freight Transportation                               | Pipeline Transportation                                      |
| Storage                                                  | Post Services                                                |
| Telecommunication Services                               | Computer and Software Services                               |
| <b>Wholesale, Retail Trade and Catering Services</b>     |                                                              |
| Wholesale and Retail Trade                               | Hotels                                                       |
| Catering Services                                        |                                                              |
| <b>Others</b>                                            |                                                              |
| Financial Services                                       | Insurance Services                                           |
| Real Estate                                              | Leasing                                                      |
| Business Services                                        | Tourism                                                      |
| Scientific Research                                      | Professional and Other Scientific and Technological Services |
| Geographical Surveying and Mapping                       | Water Conservation Management                                |
| Environmental Resources and Public Facilities Management | Resident and Other Services                                  |
| Education                                                | Sanitation                                                   |
| Social Security and Welfare                              | Culture, Arts, Broadcasting, Movie, and Television           |
| Sports                                                   | Entertainment                                                |
| Public Administration and Social Organizations           |                                                              |

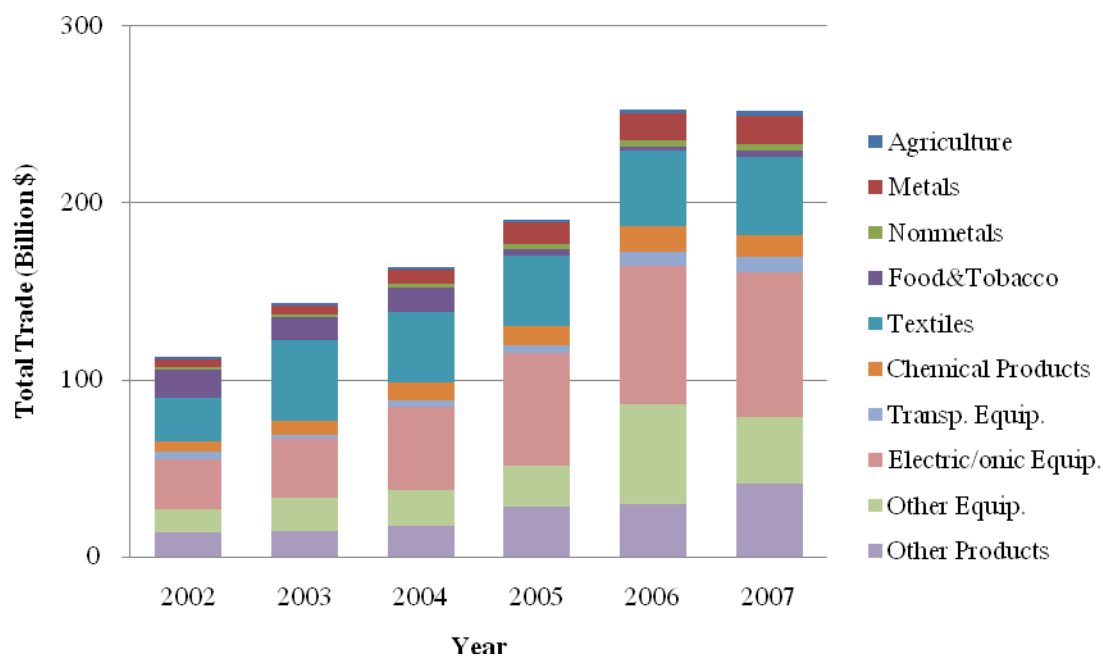

Figure S1 Total Chinese exports to the U.S. by commodity group in 2002 dollars.

**Table S3 Embodied energy in the eastbound China-U.S. trade by commodity group and energy type in PJ.**

| 2002                          | Coal   | Coke  | Crude Oil | Gasoline | Kerosene | Diesel Oil | Fuel Oil | Natural Gas | Electricity |
|-------------------------------|--------|-------|-----------|----------|----------|------------|----------|-------------|-------------|
| Agriculture                   | 20.1   | 1.8   | 7.8       | 0.6      | 0.0      | 3.2        | 0.9      | 0.9         | 3.9         |
| Metals                        | 814.5  | 79.8  | 56.5      | 4.2      | 0.5      | 13.7       | 26.5     | 6.5         | 96.4        |
| Nonmetals                     | 114.0  | 6.5   | 19.4      | 1.3      | 0.1      | 5.1        | 5.5      | 2.3         | 16.8        |
| Food                          | 280.8  | 13.2  | 54.0      | 12.0     | 0.5      | 13.5       | 10.7     | 7.4         | 48.0        |
| Textiles                      | 740.6  | 50.5  | 219.6     | 17.0     | 1.9      | 40.7       | 40.8     | 29.9        | 155.5       |
| Chemical Products             | 344.0  | 32.2  | 186.1     | 5.4      | 0.7      | 14.5       | 20.7     | 31.3        | 70.9        |
| Transportation Equipment      | 342.7  | 37.2  | 36.9      | 2.7      | 0.4      | 7.2        | 11.7     | 4.7         | 42.7        |
| Electric/Electronic Equipment | 2251.4 | 137.3 | 317.1     | 18.9     | 2.1      | 57.4       | 85.3     | 48.0        | 298.4       |
| Other Equipment               | 1377.7 | 141.5 | 141.4     | 11.0     | 1.3      | 27.7       | 47.1     | 19.5        | 164.3       |
| Other Products                | 818.8  | 59.5  | 160.0     | 12.8     | 1.7      | 29.6       | 32.3     | 20.9        | 123.4       |
| 2003                          |        |       |           |          |          |            |          |             |             |
| Agriculture                   | 23.7   | 2.0   | 9.3       | 1.2      | 0.2      | 4.6        | 1.2      | 1.1         | 4.9         |
| Metals                        | 274.6  | 72.2  | 55.8      | 6.4      | 1.3      | 13.9       | 12.2     | 5.9         | 68.0        |
| Nonmetals                     | 107.7  | 5.5   | 19.7      | 2.4      | 0.3      | 6.6        | 6.1      | 2.5         | 17.4        |
| Food                          | 172.3  | 9.8   | 42.5      | 11.3     | 1.1      | 16.0       | 8.8      | 6.0         | 35.9        |
| Textiles                      | 1194.4 | 76.7  | 359.1     | 47.3     | 8.1      | 102.0      | 70.1     | 54.1        | 273.6       |
| Chemical Products             | 464.3  | 33.3  | 206.8     | 14.4     | 1.8      | 25.0       | 28.8     | 42.5        | 91.7        |
| Transportation Equipment      | 86.9   | 20.6  | 21.6      | 2.5      | 0.6      | 5.1        | 4.1      | 2.7         | 18.3        |
| Electric/Electronic Equipment | 1074.7 | 120.2 | 313.1     | 34.5     | 6.4      | 71.1       | 59.4     | 50.2        | 235.6       |
| Other Equipment               | 758.6  | 182.2 | 176.5     | 22.6     | 4.6      | 42.6       | 35.4     | 23.8        | 154.9       |
| Other Products                | 471.5  | 50.2  | 144.0     | 17.0     | 3.6      | 35.0       | 24.5     | 20.2        | 100.7       |
| 2004                          |        |       |           |          |          |            |          |             |             |
| Agriculture                   | 19.6   | 1.7   | 9.2       | 1.3      | 0.2      | 5.6        | 1.0      | 1.1         | 4.6         |
| Metals                        | 293.3  | 97.5  | 81.5      | 7.9      | 2.1      | 18.6       | 13.5     | 7.8         | 78.2        |
| Nonmetals                     | 91.6   | 4.2   | 19.1      | 1.8      | 0.4      | 5.2        | 4.9      | 3.1         | 14.3        |
| Food                          | 114.4  | 6.7   | 31.7      | 5.1      | 1.1      | 14.1       | 5.5      | 5.5         | 27.3        |
| Textiles                      | 723.6  | 48.9  | 226.4     | 31.7     | 7.2      | 79.9       | 42.8     | 36.0        | 196.9       |
| Chemical Products             | 378.7  | 28.6  | 189.6     | 8.9      | 2.1      | 21.5       | 20.0     | 33.7        | 80.9        |
| Transportation Equipment      | 80.6   | 22.2  | 26.1      | 3.1      | 0.9      | 6.6        | 3.9      | 3.3         | 19.9        |
| Electric/Electronic Equipment | 1013.4 | 127.5 | 370.6     | 37.9     | 9.6      | 84.7       | 59.0     | 55.3        | 254.7       |
| Other Equipment               | 524.1  | 139.4 | 163.9     | 19.1     | 4.8      | 40.0       | 25.6     | 21.3        | 120.1       |
| Other Products                | 373.2  | 44.8  | 135.8     | 15.2     | 3.9      | 35.0       | 19.7     | 18.4        | 88.9        |
| 2005                          |        |       |           |          |          |            |          |             |             |
| Agriculture                   | 19.4   | 1.8   | 7.9       | 1.2      | 0.2      | 5.6        | 0.7      | 1.1         | 4.9         |

|                               |        |       |       |      |      |       |      |      |       |
|-------------------------------|--------|-------|-------|------|------|-------|------|------|-------|
| Metals                        | 426.8  | 161.4 | 105.2 | 10.7 | 2.9  | 27.5  | 15.6 | 11.7 | 118.9 |
| Nonmetals                     | 206.6  | 9.7   | 29.7  | 3.3  | 0.9  | 12.4  | 10.2 | 7.0  | 34.0  |
| Food                          | 59.6   | 3.9   | 14.6  | 2.7  | 0.6  | 8.2   | 2.5  | 2.8  | 14.4  |
| Textiles                      | 711.7  | 53.2  | 195.3 | 29.6 | 6.6  | 79.3  | 32.5 | 36.9 | 209.7 |
| Chemical Products             | 387.2  | 35.2  | 194.9 | 9.1  | 2.1  | 24.4  | 16.7 | 41.8 | 100.9 |
| Transportation Equipment      | 90.1   | 27.8  | 24.6  | 3.4  | 0.9  | 7.6   | 3.5  | 4.1  | 22.7  |
| Electric/Electronic Equipment | 1330.3 | 181.0 | 415.0 | 46.6 | 11.7 | 114.2 | 63.6 | 76.2 | 351.5 |
| Other Equipment               | 553.9  | 165.0 | 145.5 | 18.9 | 4.9  | 44.0  | 21.3 | 23.1 | 139.2 |
| Other Products                | 595.4  | 79.3  | 187.7 | 23.7 | 5.8  | 58.4  | 25.1 | 30.9 | 161.3 |
| 2006                          |        |       |       |      |      |       |      |      |       |
| Agriculture                   | 21.7   | 2.4   | 8.3   | 1.4  | 0.2  | 6.8   | 0.8  | 1.2  | 6.1   |
| Metals                        | 481.2  | 201.1 | 102.9 | 12.2 | 3.3  | 30.2  | 15.9 | 13.7 | 139.1 |
| Nonmetals                     | 184.7  | 10.7  | 27.4  | 3.3  | 0.9  | 11.7  | 9.6  | 6.5  | 35.5  |
| Food                          | 25.8   | 2.0   | 6.1   | 1.3  | 0.3  | 4.4   | 1.0  | 1.2  | 7.5   |
| Textiles                      | 707.1  | 61.5  | 176.2 | 30.3 | 6.8  | 80.7  | 31.3 | 38.6 | 237.8 |
| Chemical Products             | 428.4  | 47.3  | 193.6 | 10.8 | 2.6  | 28.2  | 18.5 | 47.6 | 133.9 |
| Transportation Equipment      | 154.1  | 55.2  | 39.9  | 6.1  | 1.6  | 13.4  | 5.6  | 7.3  | 41.6  |
| Electric/Electronic Equipment | 1457.3 | 231.4 | 427.9 | 54.2 | 13.8 | 129.0 | 68.0 | 87.8 | 421.5 |
| Other Equipment               | 1332.0 | 511.5 | 303.6 | 45.4 | 11.7 | 101.6 | 45.4 | 52.5 | 336.7 |
| Other Products                | 571.7  | 87.1  | 165.6 | 23.7 | 6.0  | 57.4  | 23.4 | 31.3 | 168.6 |
| 2007                          |        |       |       |      |      |       |      |      |       |
| Agriculture                   | 22.1   | 2.3   | 8.4   | 1.4  | 0.2  | 6.5   | 0.7  | 1.4  | 5.9   |
| Metals                        | 436.3  | 169.3 | 97.4  | 11.5 | 3.2  | 27.8  | 12.4 | 14.6 | 131.7 |
| Nonmetals                     | 148.2  | 8.6   | 24.0  | 2.8  | 0.8  | 8.9   | 7.2  | 6.1  | 28.6  |
| Food                          | 48.8   | 3.7   | 11.6  | 2.4  | 0.6  | 7.3   | 1.8  | 2.6  | 13.1  |
| Textiles                      | 645.7  | 52.9  | 160.8 | 27.0 | 6.4  | 69.7  | 24.7 | 37.9 | 213.6 |
| Chemical Products             | 348.8  | 38.2  | 168.9 | 8.7  | 2.1  | 21.8  | 13.3 | 41.5 | 97.8  |
| Transportation Equipment      | 153.9  | 54.8  | 40.3  | 5.6  | 1.5  | 12.5  | 4.8  | 7.9  | 40.5  |
| Electric/Electronic Equipment | 1306.0 | 203.4 | 396.8 | 48.8 | 13.1 | 116.4 | 53.6 | 87.0 | 378.6 |
| Other Equipment               | 753.2  | 273.6 | 182.7 | 26.5 | 7.1  | 59.1  | 22.7 | 33.8 | 195.5 |
| Other Products                | 668.0  | 102.1 | 204.0 | 27.7 | 7.3  | 67.4  | 24.8 | 41.4 | 192.8 |



**Table S4 Embodied air emissions in the eastbound China-U.S. trade by commodity group in Mt.**

| CO <sub>2</sub>               | 2002   | 2003   | 2004   | 2005   | 2006   | 2007   |
|-------------------------------|--------|--------|--------|--------|--------|--------|
| Agriculture                   | 2.02   | 2.58   | 2.41   | 2.24   | 2.87   | 4.21   |
| Metals                        | 29.86  | 30.64  | 34.73  | 52.88  | 41.25  | 85.54  |
| Nonmetals                     | 15.76  | 16.51  | 13.63  | 30.90  | 41.36  | 27.73  |
| Food                          | 19.09  | 17.06  | 11.07  | 5.80   | 2.74   | 7.90   |
| Textiles                      | 66.42  | 118.87 | 71.15  | 69.00  | 65.54  | 105.70 |
| Chemical Products             | 33.76  | 42.98  | 31.68  | 34.05  | 49.28  | 59.76  |
| Transportation Equipment      | 15.33  | 9.50   | 9.23   | 10.79  | 14.20  | 29.96  |
| Electric/Electronic Equipment | 112.24 | 119.91 | 112.98 | 152.01 | 190.41 | 243.26 |
| Other Equipment               | 61.85  | 85.51  | 61.12  | 67.38  | 126.43 | 147.07 |
| Other Products                | 48.75  | 47.89  | 37.83  | 61.10  | 145.32 | 118.21 |
| SO <sub>2</sub>               |        |        |        |        |        |        |
| Agriculture                   | 0.01   | 0.02   | 0.02   | 0.01   | 0.02   | 0.03   |
| Metals                        | 0.46   | 0.45   | 0.44   | 0.56   | 0.57   | 0.74   |
| Nonmetals                     | 0.07   | 0.08   | 0.07   | 0.16   | 0.20   | 0.16   |
| Food                          | 0.15   | 0.13   | 0.08   | 0.04   | 0.02   | 0.06   |
| Textiles                      | 0.54   | 0.93   | 0.54   | 0.51   | 0.50   | 0.79   |
| Chemical Products             | 0.28   | 0.33   | 0.25   | 0.25   | 0.42   | 0.43   |
| Transportation Equipment      | 0.14   | 0.08   | 0.08   | 0.08   | 0.13   | 0.21   |
| Electric/Electronic Equipment | 1.56   | 1.34   | 1.25   | 1.44   | 1.70   | 1.94   |
| Other Equipment               | 0.56   | 0.73   | 0.49   | 0.49   | 1.12   | 1.03   |
| Other Products                | 0.42   | 0.39   | 0.30   | 0.45   | 0.92   | 0.86   |
| NO <sub>x</sub>               |        |        |        |        |        |        |
| Agriculture                   | 0.01   | 0.01   | 0.01   | 0.01   | 0.01   | 0.01   |
| Metals                        | 0.09   | 0.10   | 0.11   | 0.16   | 0.18   | 0.28   |
| Nonmetals                     | 0.04   | 0.04   | 0.04   | 0.08   | 0.11   | 0.08   |
| Food                          | 0.08   | 0.07   | 0.05   | 0.02   | 0.01   | 0.03   |
| Textiles                      | 0.27   | 0.49   | 0.30   | 0.29   | 0.29   | 0.41   |
| Chemical Products             | 0.13   | 0.16   | 0.12   | 0.13   | 0.21   | 0.20   |
| Transportation Equipment      | 0.05   | 0.03   | 0.03   | 0.03   | 0.06   | 0.10   |
| Electric/Electronic Equipment | 0.39   | 0.43   | 0.41   | 0.54   | 0.75   | 0.84   |
| Other Equipment               | 0.20   | 0.29   | 0.20   | 0.22   | 0.55   | 0.48   |
| Other Products                | 0.18   | 0.19   | 0.15   | 0.24   | 0.61   | 0.43   |

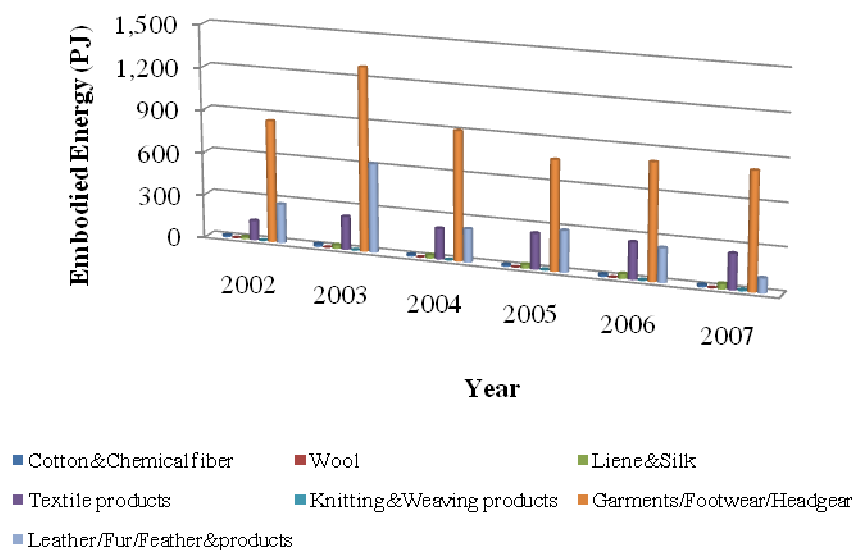

Figure S2 Embodied energy in Chinese textile exports to the U.S.

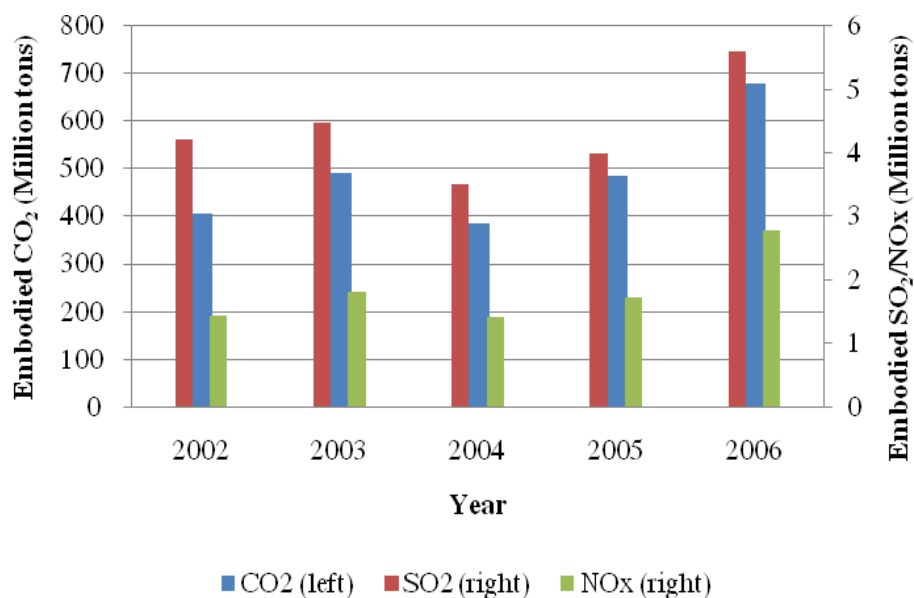

Figure S3 Embodied air emissions in Chinese exports to the U.S.

**Table S5 Total Chinese exports to the world and embodied energy and emissions.**

| Item            | Unit                    | 2002    | 2003    | 2004    | 2005    | 2006    | 2007    |
|-----------------|-------------------------|---------|---------|---------|---------|---------|---------|
| Exports         | Billion \$ <sup>1</sup> | 325.56  | 429.10  | 564.73  | 702.32  | 865.22  | 1058.92 |
| Energy          | EJ                      | 23.55   | 26.24   | 25.84   | 32.90   | 39.41   | 39.27   |
| CO <sub>2</sub> | Mt                      | 1566.07 | 2010.18 | 1695.49 | 2147.06 | 2344.56 | 4206.86 |
| SO <sub>2</sub> | Mt                      | 18.09   | 20.48   | 17.38   | 19.61   | 22.72   | 32.76   |
| NO <sub>x</sub> | Mt                      | 5.41    | 7.04    | 5.97    | 7.31    | 9.68    | 14.22   |

**Table S6 Eastbound trade to the U.S. and embodied energy and emissions.**

| Item            | Unit                    | 2002   | 2003   | 2004   | 2005   | 2006   | 2007   |
|-----------------|-------------------------|--------|--------|--------|--------|--------|--------|
| Exports         | Billion \$ <sup>1</sup> | 112.97 | 143.22 | 163.99 | 190.83 | 252.59 | 252.04 |
| Energy          | EJ                      | 10.64  | 8.52   | 7.13   | 8.57   | 10.76  | 9.08   |
| CO <sub>2</sub> | Mt                      | 405.08 | 491.45 | 385.83 | 486.15 | 679.39 | 829.34 |
| SO <sub>2</sub> | Mt                      | 4.20   | 4.48   | 3.51   | 4.00   | 5.60   | 6.25   |
| NO <sub>x</sub> | Mt                      | 1.43   | 1.81   | 1.42   | 1.72   | 2.78   | 2.86   |

**Table S7 Percentage of Chinese exports and embodied energy and emissions to the U.S. in the total exports to the world.**

| Item            | 2002   | 2003   | 2004   | 2005   | 2006   | 2007   |
|-----------------|--------|--------|--------|--------|--------|--------|
| Exports         | 34.70% | 26.33% | 20.00% | 16.08% | 13.06% | 10.67% |
| Energy          | 45.20% | 32.46% | 27.59% | 26.05% | 27.30% | 23.11% |
| CO <sub>2</sub> | 25.87% | 24.45% | 22.76% | 22.64% | 28.98% | 19.71% |
| SO <sub>2</sub> | 23.24% | 21.88% | 20.21% | 20.39% | 24.63% | 19.09% |
| NO <sub>x</sub> | 26.45% | 25.69% | 23.76% | 23.47% | 28.71% | 20.11% |

<sup>1</sup> Billion dollars in 2002 constant price

## Literate Cited

---

- [1] UNSD. *United Nations Commodity Trade Statistics Database (COMTRADE)*; United Nations Statistics Division: <http://comtrade.un.org/db/default.aspx> (accessed March 2009).
- [2] Fung, K. C.; Lau, L. J.; Xiong, Y. Adjusted estimates of United States-China bilateral trade balances: An update. *Pac. Econ. Rev.* **2006**, *11* (3), 299-314.
- [3] Schindler, J. W.; Beckett, D. H. Adjusting Chinese bilateral trade data: How big is China's trade surplus? *Int. J. Appl. Econ.* **2005**, *2* (2), 27-55.
